# Supplementary material for: Ultrafast H2-selective nanoporous multilayer graphene membrane prepared by confined thermal annealing
Source: Royal Society of Chemistry journal article supplement (doi:10.1039/d1cc02946k), 2021-01-01
Supplement: d1cc02946k1.pdf [file d1cc02946k1.pdf]

Supplementary Material for

**Ultrafast H<sub>2</sub>-Selective Nanoporous Multilayer Graphene Membrane Prepared by Confined Thermal Annealing**

*Jeong Pil Kim, Eunji Choi, Junhyeok Kang, Seung Eun Choi, Yunkyoo Choi, Ohchan Kwon, and Dae Woo Kim\**

Department of Chemical and Biomolecular Engineering, Yonsei University, Yonsei-ro 50, Seodaemun-gu, Seoul 120-749, Republic of Korea

\*Email: audw1105@yonsei.ac.kr (D.W. Kim)

**Experimental**

**Preparation of graphene oxide and its suspension:** Graphene oxide (GO) was prepared by using the modified Hummer's method as described in our previous work.<sup>1</sup> Here, 3 g of GO was dispersed in 100 mL of DI water to prepare 30 mg/mL of GO solution. Then, the mixture was sonicated for 30 min and repeatedly agitated for 1 min by a shaker to form a homogenous GO suspension.

**Fabrication of nanoporous GO membrane:** The GO suspension was coated on a polyethersulfone (PES) membrane (GVS filter technology; pore diameter of 0.22 μm and membrane diameter of 5 cm) using a bar coater. The average thickness of the GO liquid coated on the PES membrane was 1.7 μm. The coated membrane was dried in an oven at 60°C for 24 h to remove residual DI water. To fabricate a nanoporous GO membrane, the GO membrane was hot-pressed at 150°C and 20 bar using a hot-press (Auto series compact automatic benchtop press, Carver INC.). The treatment time was varied from 30 min to 24 h for investigating the influence of the hot-pressing period on the GO structure and its gas permeation properties.

**Gas permeance measurement:** Single gas (H<sub>2</sub>, N<sub>2</sub>, CO<sub>2</sub>, and CH<sub>4</sub>) permeation tests of nanoporous GO membranes were conducted using a constant-volume and differential-pressure method.<sup>2</sup> The nanoporous GO membrane was placed on a stainless-steel mesh while the nanoporous GO layer faced the feed side and was fixed using epoxy glue. The stainless-steel mesh side was placed under vacuum. The gas flow was set at 10 sccm by using a mass-flow controller (MFC). The feed gas pressure was controlled to 1 bar at room temperature via a backpressure regulator, which was controlled using a convection oven. The permeation of gas was measured using a vacuum gauge (Teledyne Hastings Instruments, HVG-2020B). The permeance and selectivity were calculated using the following equations:

$$P \text{ (permeance)} = V_c \cdot (dp/dt) / (R \cdot T \cdot P_a \cdot A)$$

$$S \text{ (ideal selectivity)} = P_i / P_j$$

where  $V_c$  is the volume of the vacuum chamber (m<sup>3</sup>),  $dp/dt$  is the pressure change in the vacuum chamber per unit of time,  $R$  is the gas constant,  $T$  is the temperature (K),  $P_a$  is the atmospheric pressure (Pa), and  $A$  is the effective area of the membrane (m<sup>2</sup>).  $P_i$  and  $P_j$  are the permeations of pure gases  $i$  and  $j$ , respectively.

The permeability was calculated using the following equation:

$$\text{Permeability (Barrer)} = P \cdot T_m / (3.35 \cdot 10^{-16})$$

Where  $P$  is the permeance (mol / (m<sup>2</sup> · s · Pa)), and  $T_m$  is the thickness of the membrane (m).

**Characterization:** The morphology of the graphene membrane was observed using scanning electron microscopy (SEM, JSM-6701F, JEOL Ltd.). X-ray photoelectron spectroscopy (XPS) was performed using a K-alpha (Thermo U.K.) with a Cu(K $\alpha$ ) beam source (wavelength 1.5406 Å), and Raman spectra were obtained using a LabRAM ARAMIS (Horriba Jovin Yvon) with a 532 nm laser. X-ray diffraction (XRD) was performed using an Ultima IV (Rigaku,

wavelength: 1.54 Å) instrument, and Fourier transform-infrared spectra were measured using a Cary670 (Agilent) spectrometer. N<sub>2</sub> adsorption-desorption isotherms were obtained using a BELSORP-mini II instrument (BEL Japan).

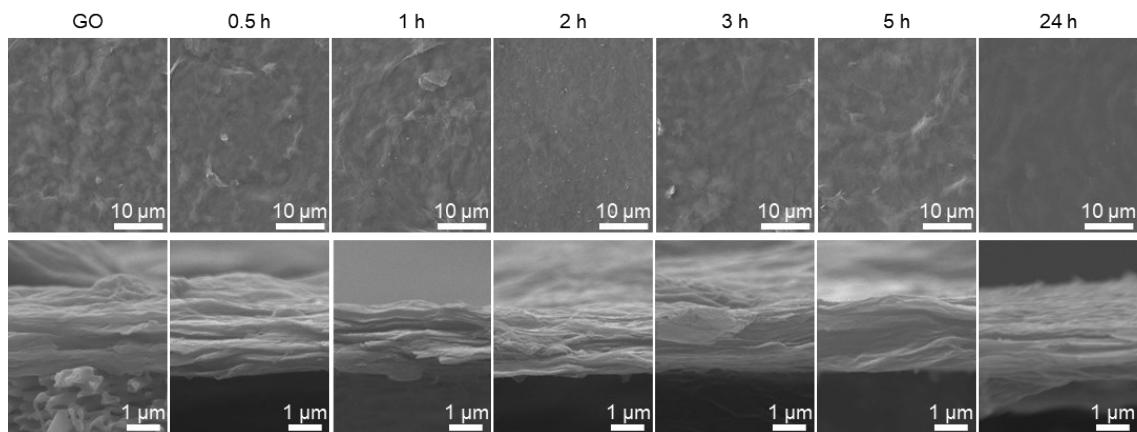

**Fig. S1.** Top (top) and cross-sectional SEM images (bottom) of GO membranes depending on hot-pressing time. Annealing was performed at 150°C in air and pressure was 20 bar.

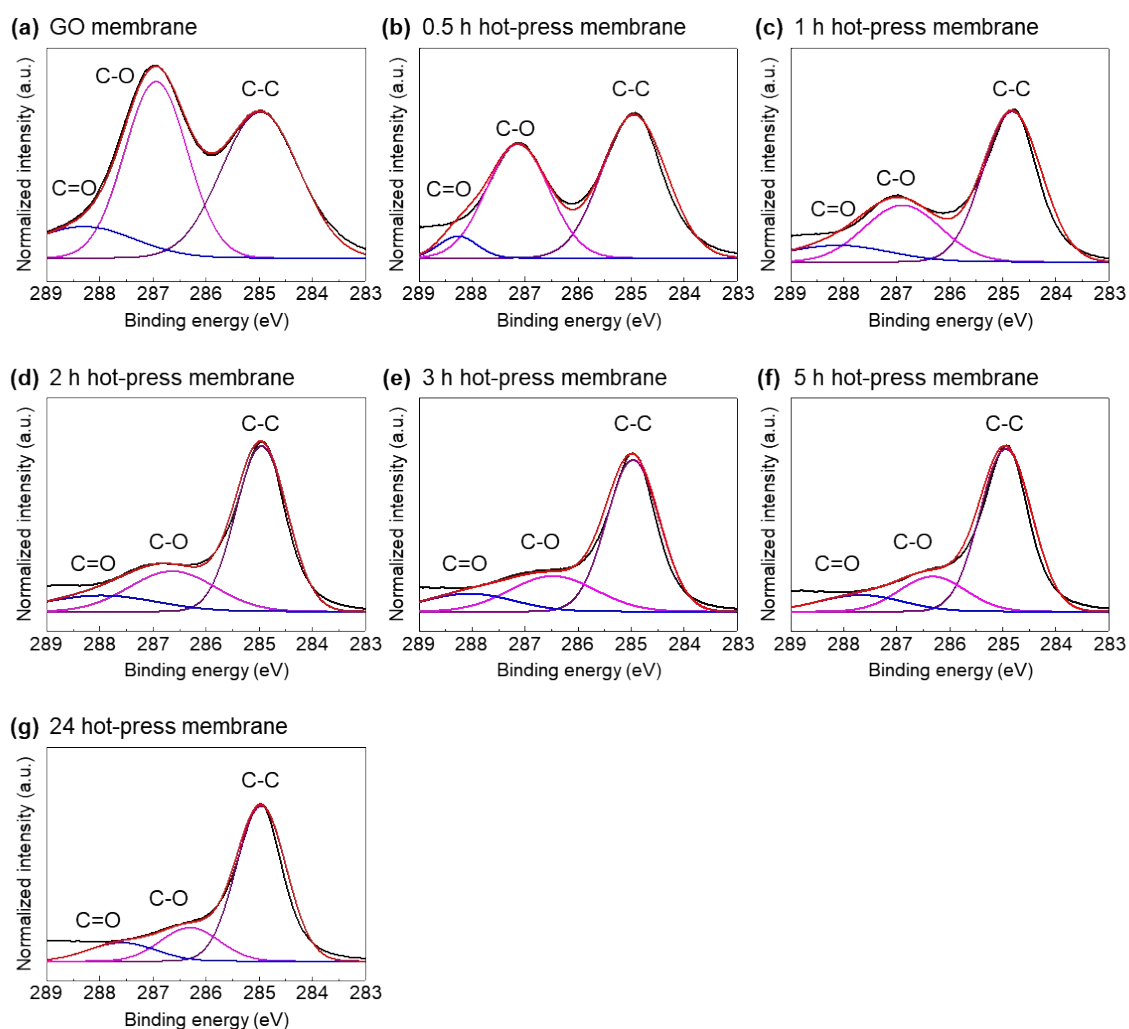

**Fig. S2.** XPS C1s spectra of nGO membranes depending on hot-pressing time.

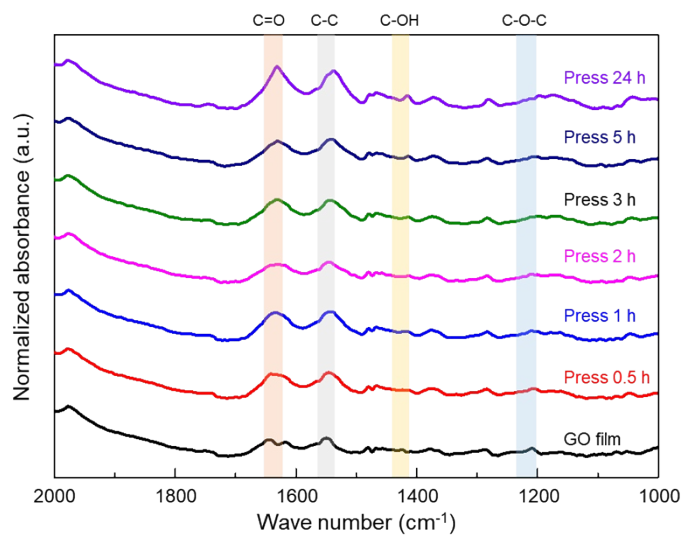

**Fig. S3.** FT-IR spectra of nGO membranes depending on hot-pressing time.

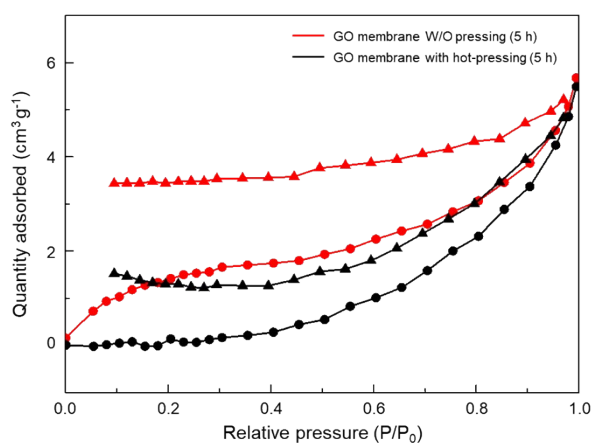

**Fig. S4.** N<sub>2</sub> adsorption-desorption isotherms of GO membrane with and without hot-pressing for 5 h. Isotherms were measured at 77 K. Significant adsorption was not observed, indicating the dense structure of the GO membrane after both annealing processes.

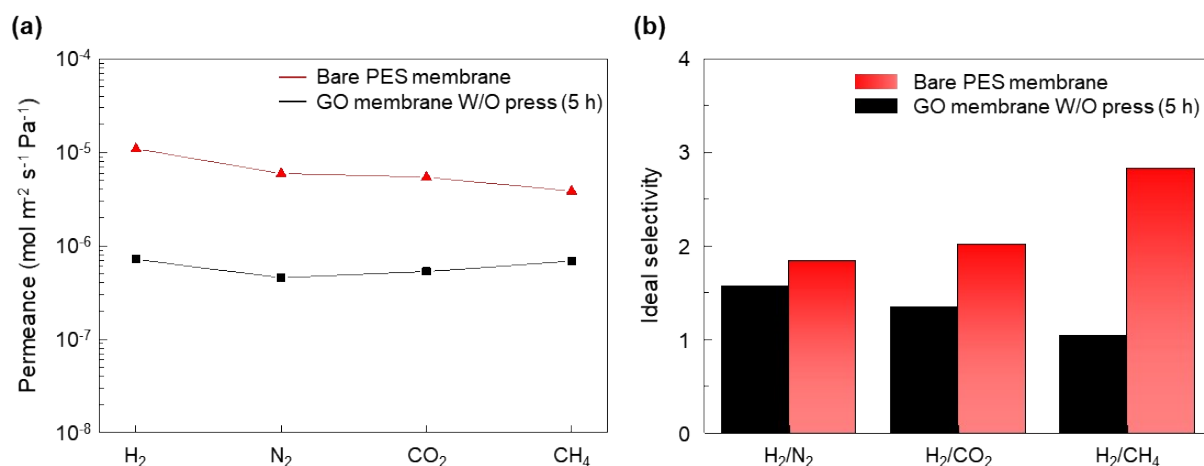

**Fig. S5.** (a) Single gas (H<sub>2</sub>, N<sub>2</sub>, CO<sub>2</sub>, CH<sub>4</sub>) permeance and (b) H<sub>2</sub> selectivity of GO membrane annealed at 150°C for 5 h without hot-pressing in comparison with those of the bare PES membrane. The permeances of GO membrane after annealing tend to be rapid; however, no selectivity is observed.

**Table S1.** Single-gas permeation results of nGO membranes prepared with hot-pressing (5 h). The single gas permeation test was conducted at 25°C and 1 bar pressure.

| Sample   |        | Single gas permeance (mol m <sup>-2</sup> s <sup>-1</sup> Pa <sup>-1</sup> ) |                 | H <sub>2</sub> /CO <sub>2</sub> selectivity | Average permeance (mol m <sup>-2</sup> s <sup>-1</sup> Pa <sup>-1</sup> ) |                 | Average H <sub>2</sub> /CO <sub>2</sub> Selectivity |
|----------|--------|------------------------------------------------------------------------------|-----------------|---------------------------------------------|---------------------------------------------------------------------------|-----------------|-----------------------------------------------------|
|          |        | H <sub>2</sub>                                                               | CO <sub>2</sub> |                                             | H <sub>2</sub>                                                            | CO <sub>2</sub> |                                                     |
| Sample 1 | test 1 | 1.41E-06                                                                     | 1.17E-07        | 12.05                                       | 1.95E-06                                                                  | 1.61E-07        | 12.12                                               |
|          | test 2 | 1.48E-06                                                                     | 1.16E-07        | 12.76                                       |                                                                           |                 |                                                     |
|          | test 3 | 1.41E-06                                                                     | 1.15E-07        | 12.26                                       |                                                                           |                 |                                                     |
| Sample 2 | test 1 | 2.25E-06                                                                     | 2.17E-07        | 10.37                                       |                                                                           |                 |                                                     |
|          | test 2 | 2.63E-06                                                                     | 2.16E-07        | 12.18                                       |                                                                           |                 |                                                     |
|          | test 3 | 2.72E-06                                                                     | 2.20E-07        | 12.36                                       |                                                                           |                 |                                                     |
| Sample 3 | test 1 | 1.53E-06                                                                     | 1.11E-07        | 13.78                                       |                                                                           |                 |                                                     |
|          | test 2 | 1.60E-06                                                                     | 1.11E-07        | 14.41                                       |                                                                           |                 |                                                     |
|          | test 3 | 1.57E-06                                                                     | 1.10E-07        | 14.27                                       |                                                                           |                 |                                                     |
| Sample 4 | test 1 | 2.73E-06                                                                     | 2.20E-07        | 12.41                                       |                                                                           |                 |                                                     |
|          | test 2 | 2.36E-06                                                                     | 2.21E-07        | 10.68                                       |                                                                           |                 |                                                     |
|          | test 3 | 2.36E-06                                                                     | 2.18E-07        | 10.83                                       |                                                                           |                 |                                                     |
| Sample 5 | test 1 | 1.69E-06                                                                     | 1.40E-07        | 12.07                                       |                                                                           |                 |                                                     |
|          | test 2 | 1.77E-06                                                                     | 1.39E-07        | 12.73                                       |                                                                           |                 |                                                     |
|          | test 3 | 1.68E-06                                                                     | 1.37E-07        | 12.26                                       |                                                                           |                 |                                                     |

**Table S2.** Comparison of H<sub>2</sub>/CO<sub>2</sub> separation performance with that of the previous nanomaterial-based membranes.

| Material                           | H <sub>2</sub> permeability [Barrer] | H <sub>2</sub> /CO <sub>2</sub> selectivity | Thickness [nm] | Temperature [K] | Symbol | Reference |
|------------------------------------|--------------------------------------|---------------------------------------------|----------------|-----------------|--------|-----------|
| GO (Hummers)                       | 2.7                                  | 3400                                        | 9              | 293             | ●      | 13        |
| GO (Brodie's)                      | 28.26                                | 80.74                                       | 200            | 293             | ●      | 29        |
| ZIF-8                              | 3771                                 | 5                                           | 6000           | 303             | ▲      | 30        |
| ZIF-8 modified GO                  | 16.8                                 | 406                                         | 70             | 293             | ▼      | 31        |
| ZIF-8@GO                           | 7761                                 | 15                                          | 20000          | 523             | ▼      | 32        |
| MIL-53                             | 11971                                | 6.8                                         | 8000           | 293             | ■      | 33        |
| EFDA-GO                            | 840                                  | 29                                          | 1000           | 298             | ◆      | 34        |
| Highly oriented ZIF                | 89.6                                 | 106                                         | 200            | 303             | ◀      | 35        |
| CMS@900                            | 36                                   | 53                                          | 750000         | 423             | ▶      | 36        |
| Zn <sub>2</sub> (bim) <sub>4</sub> | 2740                                 | 60                                          | 356            | 298             | ◐      | 37        |
| CTF-1                              | 510                                  | 17                                          | 100            | 298             | ■      | 38        |
| COF                                | 105                                  | 23                                          | 41             | 423             | ●      | 39        |
| GO                                 | 40                                   | 2.3                                         | 1780           | 298             | ★      | This work |
| Without press 5 h                  | 6400                                 | 1.4                                         | 2000           | 298             | ★      | This work |
| With press 5 h                     | 10360                                | 12                                          | 1580           | 298             | ★      | This work |

## Reference

- (1) J. Kim, J.-H. Eum, J. Kang, O. Kwon, H. Kim and D. W. Kim, *Sci. Rep.*, 2021, **11**, 2063
- (2) E. Choi, S. J. Hong, Y.-J. Kim, S. E. Choi, Y. Choi, J. H. Kim, J. Kang, O. Kwon, K. Eum, B. Han and D. W. Kim, *Adv. Funct. Mater.*, 2021, **17**, 2011146
